# Supplementary material for: Cold-water coral reefs thriving under hypoxia
Source: Springer Nature journal article supplement (doi:10.1007/s00338-020-01934-6), 2020-04-21
Supplement: MOESM1 [file 338_2020_1934_MOESM1_ESM.docx]

**Online Resource 1 to**

**Cold-water coral reefs thriving under hypoxia**

**CORAL REEFS**

Dierk Hebbeln*, Claudia Wienberg, Wolf-Christian Dullo, André Freiwald, Furu Mienis, Covadonga Orejas, Jürgen Titschack

* Corresponding author

MARUM – Center for Marine Environmental Sciences, University of Bremen, Leobener Strasse 8, 28359 Bremen, Germany

E-mail: [dhebbeln@marum.de](mailto:dhebbeln@marum.de)

**Online Resource** **1.** Metadata of eight remotely operated vehicle (ROV) dives crossing cold-water coral reefs on the Angolan margin during RV Meteor expedition M122 (ANNA) in 2016. A Seabird SBE37 CTD mounted on the ROV recorded data for dissolved oxygen concentrations and temperature concurrently to the video observations

| **Dive-ID** | **Event** | **Date**  (dd.mm.yyyy) | **Time**  (UTC) | **Water depth**  (m) | **Latitude**  (S) | **Longitude**  (E) |
| --- | --- | --- | --- | --- | --- | --- |
| GeoB 20904-1 | Start | 17.01.2016 | 09:15 | 502 | 9°43.77' | 12°42.85' |
| End | 17.01.2016 | 16:30 | 483 | 9°43.66' | 12°42.89' |
| GeoB 20917-1 | Start | 19.01.2016 | 11:00 | 473 | 9°43.67' | 12°42.89' |
| End | 19.01.2016 | 17:08 | 426 | 9°43.01' | 12°43.01' |
| GeoB 20920-1 | Start | 20.01.2016 | 10:00 | 336 | 9°44.76' | 12°46.93' |
| End | 20.01.2016 | 16:19 | 251 | 9°44.61' | 12°46.88' |
| GeoB 20927-1 | Start | 21.01.2016 | 06:56 | 402 | 9°42.27' | 12°43.86' |
| End | 21.01.2016 | 14:42 | 356 | 9°42.00' | 12°43.88' |
| GeoB 20930-1 | Start | 22.01.2016 | 06:14 | 412 | 9°49.36' | 12°46.41' |
| End | 22.01.2016 | 14:01 | 425 | 9°49.24' | 12°46.69' |
| GeoB 20938-1 | Start | 23.01.2016 | 08:04 | 320 | 9°43.05' | 12°45.86' |
| End | 23.01.2016 | 13:37 | 256 | 9°43.03' | 12°46.10' |
| GeoB 20951-1 | Start | 24.01.2016 | 06:30 | 357 | 9°42.02' | 12°43.71' |
| End | 24.01.2016 | 12:36 | 348 | 9°42.07' | 12°43.73' |
| GeoB 20957-1 | Start | 25.01.2016 | 06:05 | 447 | 9°39.90' | 12°42.95' |
| End | 25.01.2016 | 12:45 | 331 | 9°39.74' | 12°43.15' |
