# Supplementary material for: Cold-water coral reefs thriving under hypoxia
Source: Springer Nature journal article supplement (doi:10.1007/s00338-020-01934-6), 2020-04-21
Supplement: MOESM3 [file 338_2020_1934_MOESM3_ESM.docx]

**Online Resource 3 to**

**Cold-water coral reefs thriving under hypoxia**

**CORAL REEFS**

Dierk Hebbeln*, Claudia Wienberg, Wolf-Christian Dullo, André Freiwald, Furu Mienis, Covadonga Orejas, Jürgen Titschack

* Corresponding author

MARUM – Center for Marine Environmental Sciences, University of Bremen, Leobener Strasse 8, 28359 Bremen, Germany

E-mail: [dhebbeln@marum.de](mailto:dhebbeln@marum.de)

**Online Resource** **3.** Metadata of 17 CTD casts (underwater unit: Seabird SBE9 plus additionally equipped with SBE43 sensors for DOconc; deck unit: Seabird SBE11 plus V2) conducted in the Angolan cold-water coral reef site during RV Meteor expedition M122 (ANNA) in 2016. Dissolved oxygen concentrations, temperature and fluorescence (Wetlabs sensor) data recorded during the downcasts of the CTD were used for this study (see Fig. 3).

| **Station-ID** | **Latitude**  (S) | **Longitude**  (E) | **Date**  (dd.mm.yyyy) | **Time**  (UTC) | **Water depth**  (m) |
| --- | --- | --- | --- | --- | --- |
| GeoB 20905-1 | 9°43.75' | 12°42.88' | 17.01.2016 | 17:01 | 501 |
| GeoB 20913-3 | 9°47.30' | 12°46.40' | 18.01.2016 | 18:39 | 303 |
| GeoB 20915-1 | 9°43.57' | 12°43.86' | 19.01.2016 | 06:28 | 433 |
| GeoB 20926-1 | 9°43.27' | 12°43.03' | 21.01.2016 | 05:48 | 432 |
| GeoB 20936-1 | 9°49.36' | 12°46.37' | 22.01.2016 | 18:47 | 424 |
| GeoB 20942-1 | 9°35.22' | 12°40.17' | 23.01.2016 | 17:52 | 463 |
| GeoB 20943-1 | 9°37.38' | 12°40.87' | 23.01.2016 | 18:59 | 465 |
| GeoB 20945-1 | 9°41.67' | 12°42.11' | 23.01.2016 | 22:41 | 490 |
| GeoB 20946-1 | 9°43.81' | 12°42.89' | 23.01.2016 | 23:39 | 500 |
| GeoB 20947-1 | 9°46.05' | 12°43.87' | 24.01.2016 | 01:12 | 459 |
| GeoB 20948-1 | 9°48.33' | 12°44.84' | 24.01.2016 | 02:13 | 430 |
| GeoB 20949-1 | 9°50.52' | 12°45.82' | 24.01.2016 | 03:26 | 544 |
| GeoB 20950-1 | 9°52.76' | 12°46.79' | 24.01.2016 | 04:44 | 391 |
| GeoB 20965-1 | 9°43.67' | 12°42.09' | 25.01.2016 | 22:39 | 527 |
| GeoB 20966-1 | 9°43.57' | 12°43.85' | 26.01.2016 | 00:27 | 431 |
| GeoB 20967-1 | 9°43.23' | 12°45.77' | 26.01.2016 | 01:53 | 323 |
| GeoB 20968-1 | 9°42.87' | 12°47.67' | 26.01.2016 | 03:12 | 236 |
