# Supplementary material for: Cold-water coral reefs thriving under hypoxia
Source: Springer Nature journal article supplement (doi:10.1007/s00338-020-01934-6), 2020-04-21
Supplement: MOESM4 [file 338_2020_1934_MOESM4_ESM.docx]

**Online Resource 4 to**

**Cold-water coral reefs thriving under hypoxia**

**CORAL REEFS**

Dierk Hebbeln*, Claudia Wienberg, Wolf-Christian Dullo, André Freiwald, Furu Mienis, Covadonga Orejas, Jürgen Titschack

* Corresponding author

MARUM – Center for Marine Environmental Sciences, University of Bremen, Leobener Strasse 8, 28359 Bremen, Germany

E-mail: [dhebbeln@marum.de](mailto:dhebbeln@marum.de)

**Online Resource** **4.** Metadata of 21 CTD casts conducted in the direct vicinity of the Angolan cold-water coral reefs within the framework of the Nansen Programme (Tchipilanga et al. 2018; data available at PANGAEA: https://doi.org/10.1594/PANGAEA.887162). Data for dissolved oxygen concentrations were used for comparison with CTD data obtained during RV Meteor expedition M122 (see Fig. 3).

| **Station-No.** | **Latitude** | **Longitude** | **Date**  (dd.mm.yyyy) | **Time**  (UTC) | **Water depth**  (m) |
| --- | --- | --- | --- | --- | --- |
| FN1998405-0545 | -9.8387 | 12.7375 | 10.05.1998 | 17:18 | 579 |
| FN1998405-0547 | -9.8527 | 12.7313 | 10.05.1998 | 22:30 | 647 |
| FN1998405-0546 | -9.8583 | 12.7155 | 10.05.1998 | 20:06 | 701 |
| FN1995405-0472 | -9.8358 | 12.7415 | 29.07.1995 | 19:24 | 516 |
| FN1995405-0474 | -9.8352 | 12.6918 | 30.07.1995 | 03:45 | 708 |
| FN1995405-0473 | -9.8348 | 12.7076 | 29.07.1995 | 23:19 | 629 |
| FN1996402-0342 | -9.6772 | 12.6130 | 15.03.1996 | 07:03 | 540 |
| FN1997407-0780 | -9.6337 | 12.6916 | 10.08.1997 | 19:08 | 540 |
| FN1998409-0855 | -9.8498 | 12.7955 | 10.08.1997 | 21:07 | 346 |
| FN1998409-0856 | -9.5978 | 12.6893 | 11.08.1997 | 05:11 | 408 |
| FN1999403-0373 | -9.6075 | 12.6873 | 11.08.1997 | 15:27 | 427 |
| FN2000408-0770 | -9.6668 | 12.6895 | 12.08.2000 | 06:46 | 540 |
| FN2001402-0171 | -9.6110 | 12.7141 | 11.03.2001 | 19:16 | 365 |
| FN2002403-0177 | -9.8508 | 12.7408 | 09.03.2002 | 22:22 | 615 |
| FN2007403-0324 | -9.6507 | 12.6658 | 10.03.2007 | 03:44 | 532 |
| FN2009403-0344 | -9.6718 | 12.6771 | 24.03.2009 | 19:47 | 537 |
| FN2010406-0887 | -9.6993 | 12.6961 | 11.07.2010 | 21:34 | 494 |
| FN2011408-0695 | -9.7240 | 12.7055 | 03.07.2011 | 11:32 | 503 |
| FN2013406-0878 | -9.7183 | 12.7038 | 29.06.2013 | 02:16 | 482 |
| FN2012405-1165 | -9.7202 | 12.7003 | 09.09.2012 | 21:10 | 504 |
| FN2005404-0538 | -9.6758 | 12.6728 | 09.04.2005 | 15:31 | 569 |
